# Supplementary material
Source: ML conference proceedings conference paper supplement (https://proceedings.neurips.cc/paper_files/paper/2012/hash/6aca97005c68f1206823815f66102863-Abstract.html)
Supplement: Supplementary file [file 6aca97005c68f1206823815f66102863-Supplemental.zip]

---

# Large Scale Distributed Deep Networks: Appendix

---

Jeffrey Dean, Greg S. Corrado, Rajat Monga, Kai Chen,  
Matthieu Devin, Quoc V. Le, Mark Z. Mao, Marc'Aurelio Ranzato,  
Andrew Senior, Paul Tucker, Ke Yang, Andrew Y. Ng  
{jeff, gcorrado}@google.com  
Google Inc., Mountain View, CA

## 1 Appendix

For completeness, here we provide pseudocode for the model replica (client) side of Downpour SGD (Algorithm 0.1), and Sandblaster L-BFGS (Algorithm 0.2).

---

**Algorithm 1.1:** DOWNPOURSGDCIENT( $\alpha, n_{fetch}, n_{push}$ )

---

```
procedure STARTASYNCHRONOUSLYFETCHINGPARAMETERS(parameters)
  parameters  $\leftarrow$  GETPARAMETERSFROMPARAMSERVER()

procedure STARTASYNCHRONOUSLYPUSHINGGRADIENTS(accruedgradients)
  SENDGRADIENTSTOPARAMSERVER(accruedgradients)
  accruedgradients  $\leftarrow$  0

main
  global parameters, accruedgradients
  step  $\leftarrow$  0
  accruedgradients  $\leftarrow$  0
  while true
    if (step mod  $n_{fetch}$ ) == 0
      then STARTASYNCHRONOUSLYFETCHINGPARAMETERS(parameters)
      data  $\leftarrow$  GETNEXTMINIBATCH()
      gradient  $\leftarrow$  COMPUTEGRADIENT(parameters, data)
    do {
      accruedgradients  $\leftarrow$  accruedgradients + gradient
      parameters  $\leftarrow$  parameters -  $\alpha * \text{gradient}$ 
      if (step mod  $n_{push}$ ) == 0
        then STARTASYNCHRONOUSLYPUSHINGGRADIENTS(accruedgradients)
    }
    step  $\leftarrow$  step + 1
```

---

Sandblaster is a framework for distributed batch optimization procedures. An essential concept in Sandblaster is decomposing operations into local computation on the DistBelief parameter server. By way of example, suppose we have 1 billion parameters and 10 parameter server shards, so that each shard has 1/10 of the parameters. It is possible to decompose L-BFGS into a sequence of scalar-vector products ( $\alpha \times \mathbf{x}$ ) and vector-vector inner products ( $\mathbf{x}^T \mathbf{y}$ ), where each vector is 1 billion dimensional. If one shard is always responsible for the first 1/10 of every vector used internally in L-BFGS, and a second shard is always responsible for the second 1/10 of every vector, and so on up to the final shard always being responsible for the final 1/10 of every vector, it is possible to show that these scalar-vector and vector-vector operations can all be done in a distributed fashion with very little communication, so that any intermediate vector-valued results are automatically stored in the same distributed fashion, and any intermediate scalar-valued result is communicated to all the shards.

---

**Algorithm 1.2:** SANDBLASTERLBFGS()

---

```
procedure REPLICAPROCESSPORTION(portion)
  if (!hasParametersForStep)
    then parameters  $\leftarrow$  GETPARAMETERSFROMPARAMSERVER()
  data  $\leftarrow$  GETDATAPORTION(portion)
  gradient  $\leftarrow$  COMPUTEGRADIENT(parameters, data)
  localAccruedGradients  $\leftarrow$  localAccruedGradients + gradient

procedure PARAMETERSERVER.PERFORMOPERATION(operation)
  PerformOperation

main
  step  $\leftarrow$  0
  while true
    comment: PS: ParameterServer
    PS.accruedgradients  $\leftarrow$  0
    while (batchProcessed < batchSize)
      for all (modelReplicas) comment: Loop is parallel and asynchronous
      do {
        do {
          if (modelReplicaAvailable)
            then { REPLICAPROCESSPORTION(modelReplica)
                  batchProcessed  $\leftarrow$  batchProcessed + portion
                }
          if (modelReplicaWorkDone and timeToSendGradients)
            then { SENDGRADIENTS(modelReplica)
                  PS.accruedGradients  $\leftarrow$  PS.accruedGradients + gradient
                }
        }
      }
    COMPUTELBFGSDIRECTION(PS.Gradients, PS.History, PS.Direction)
    LINESEARCH(PS.Parameters, PS.Direction)
    PS.UPDATEPARAMETERS(PS.parameters, PS.accruedGradients)
    step  $\leftarrow$  step + 1
```

---
